# Supplementary material for: Differential DNA methylation profile in infants born small-for-gestational-age: association with markers of adiposity and insulin resistance from birth to age 24 months
Source: HighWire-hosted journal article supplement (doi:10.1136/bmjdrc-2020-001402), 2020-10-01
Supplement: bmjdrc-2020-001402supp005_data_supplement.pdf [file bmjdrc-2020-001402supp005_data_supplement.pdf]

**Supplemental Table 4.** Hypomethylated “Top Ranking genes” (n=15) in SGA infants at the age of 12 months.

| Gene Symbol      | Gene Denomination                               | Chromosome Location & Number of CPG Islands | Function                                      | <i>P value</i> |
|------------------|-------------------------------------------------|---------------------------------------------|-----------------------------------------------|----------------|
| * <i>SLC2A8</i>  | Solute Carrier Family 2 Member 8                | chr9:130158927-130158971                    | Facilitated glucose transporter               | 0.001          |
| * <i>CHGA</i>    | Chromogranin A                                  | chr14:93389334-93389378                     | Regulation of insulin sensitivity             | 0.001          |
| * <i>GAS6</i>    | Growth arrest-specific 6                        | chr13:114537417-114537461                   | Obesity, inflammation, insulin resistance     | 0.001          |
| * <i>ONECUT1</i> | One cut homeobox 1                              | chr15:53083696-53083751                     | Regulation of β-cell differentiation          | 0.001          |
| * <i>CTRP1</i>   | C1q and tumor necrosis factor related protein 1 | chr17:77020067-77020111                     | Regulation of glucose and lipid metabolism    | 0.001          |
| * <i>FABP5</i>   | Fatty acid binding protein 5                    | chr8:82192395-82192444                      | Lipid metabolism                              | 0.001          |
| <i>LMF1</i>      | Lipase maturation factor 1                      | chr16:1021264-1021308                       | Maturation and transport of LPL               | 0.001          |
| <i>MIDN</i>      | Midnolin                                        | chr19:1248359-1248403                       | Regulation of glucokinase activity in β-cells | 0.001          |
| <i>TM6SF2</i>    | Transmembrane 6 superfamily member 2            | chr19:19384054-19384098                     | Lipoprotein metabolism                        | 0.002          |
| <i>ROBO4</i>     | Roundabout homolog 4                            | chr11:124767951-124768010                   | Regulation of vascular permeability           | 0.003          |
| * <i>TRAF2</i>   | TNF receptor-associated factor 2                | chr9:139780737-139780781                    | Regulation of glucose metabolism              | 0.004          |
| <i>DNAI2</i>     | Dynein axonemal intermediate chain 2            | chr17:72270236-72270291                     | Cilium biogenesis                             | 0.005          |
| <i>PDZRN3</i>    | PDZ domain containing ring finger 3             | chr3:73674097-73674141                      | Regulation of adipogenesis                    | 0.006          |
| <i>AFTPH</i>     | Aftiphilin                                      | chr2:64751229-64751277                      | Regulation of membrane trafficking            | 0.009          |
| <i>MFF</i>       | Mitochondrial fission factor                    | chr2:228190417-228190466                    | Mitochondrial and peroxisomal fission         | 0.009          |

\*Selected genes for validation by pyrosequencing.
