# Supplementary material for: Differential DNA methylation profile in infants born small-for-gestational-age: association with markers of adiposity and insulin resistance from birth to age 24 months
Source: HighWire-hosted journal article supplement (doi:10.1136/bmjdrc-2020-001402), 2020-10-01
Supplement: bmjdrc-2020-001402supp007_data_supplement.pdf [file bmjdrc-2020-001402supp007_data_supplement.pdf]

**Supplemental Table 6.** Multivariate linear models of fat mass (a), lean mass (b) and body mass index (c) in late infancy.

| <b>(a)</b>                 |                                   |         |                |                                   |       |                |
|----------------------------|-----------------------------------|---------|----------------|-----------------------------------|-------|----------------|
|                            | <b>Total fat (g) at 12 months</b> |         |                | <b>Total fat (g) at 24 months</b> |       |                |
|                            | Beta                              | P       | R <sup>2</sup> | Beta                              | P     | R <sup>2</sup> |
| <i>NKX6.1</i> methylation  | -0.456                            | 0.002   | 21%            | --                                | --    | --             |
| <i>GPR120</i> methylation  | --                                | --      | --             | -0.693                            | 0.002 | 33%            |
| <b>(b)</b>                 |                                   |         |                |                                   |       |                |
|                            | <b>Lean mass (g) at 12 months</b> |         |                | <b>Lean mass (g) at 24 months</b> |       |                |
|                            | Beta                              | P       | R <sup>2</sup> | Beta                              | P     | R <sup>2</sup> |
| <i>SLC2A8</i> methylation  | 0.517                             | <0.0001 | 25%            | --                                | --    | --             |
| <i>ONECUT1</i> methylation | --                                | --      | --             | 0.537                             | 0.001 | 29%            |
| <b>(c)</b>                 |                                   |         |                |                                   |       |                |
|                            | <b>BMI Z-score Δ 0-24 months</b>  |         |                |                                   |       |                |
|                            | Beta                              | P       | R <sup>2</sup> |                                   |       |                |
| <i>SLC2A8</i> methylation  | -0.661                            | <0.0001 | 42%            |                                   |       |                |

(a) Non-predictive variables: *CHGA* methylation, *FABP5* methylation, *CTRP1* methylation, *CPT1A* methylation, *GAS6* methylation, *IGFBP4* methylation, *ONECUT1* methylation and *SLC2A8* methylation.

(b) Non-predictive variables: *NKX6.1* methylation, *GPR120* methylation, *CHGA* methylation, *FABP5* methylation, *CTRP1* methylation, *CPT1A* methylation, *GAS6* methylation and *IGFBP4* methylation.

(c) Non-predictive variables: *NKX6.1* methylation, *GPR120* methylation, *CHGA* methylation, *FABP5* methylation, *CTRP1* methylation, *CPT1A* methylation, *GAS6* methylation, *IGFBP4* methylation and *ONECUT1* methylation.
